# Supplementary material for: Spontaneous nanoscale polymer solution patterning using solvent evaporation driven double-dewetting edge lithography
Source: Royal Society of Chemistry journal article supplement (doi:10.1039/c1sm06431b), 2011-10-31
Supplement: c1sm06431b.pdf [file c1sm06431b.pdf]

## Electronic Supplementary Information

# Spontaneous nanoscale polymer solution patterning using solvent evaporation driven double-dewetting edge lithography

Kwang-Ho Lee<sup>a</sup>, Sang-Mook Kim<sup>b</sup>, Huisu Jeong<sup>a</sup> and Gun-Young Jung<sup>\*a</sup>

<sup>a</sup> School of Materials Science and Engineering, Gwangju Institute of Science and Technology (GIST), 261 Cheomdan-gwagiro, Buk-gu, Gwangju, 500-712, South Korea.

<sup>b</sup> Korea Photonics Technology Institute (KOPTI), ChumDan 4-ro 5, Buk-gu, Gwangju 500-779 South Korea.

### S1. A movie file of the solvent driven double-dewetting lithography process

A 1 wt% PMMA solution in chlorobenzene is dropped onto a surface engineered substrate with 50  $\mu\text{m}$  wide hydrophilic line regions at a 300  $\mu\text{m}$  space. The solution covers the hydrophilic line regions spontaneously and solute aggregates at the edges of the line pattern with the solvent evaporation via coffee stain effect. The whole processes are accomplished in 1 sec.

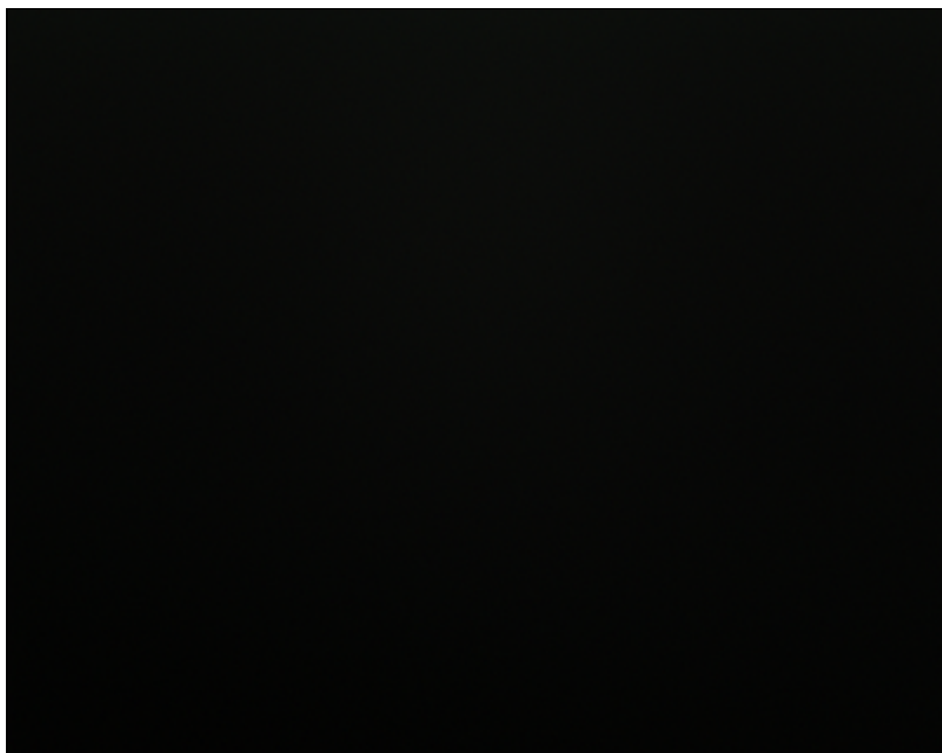

S1. DDEL\_move.avi (click on the black area to play the movie)
